# Supplementary material for: Feasibility Study of an Optical Caustic Plasmonic Light Scattering Sensor for Human Serum Anti-Dengue Protein E Antibody Detection
Source: MDPI journal article supplement (doi:10.3390/diagnostics7030047), 2017-08-17
Supplement: s1 [file s1]

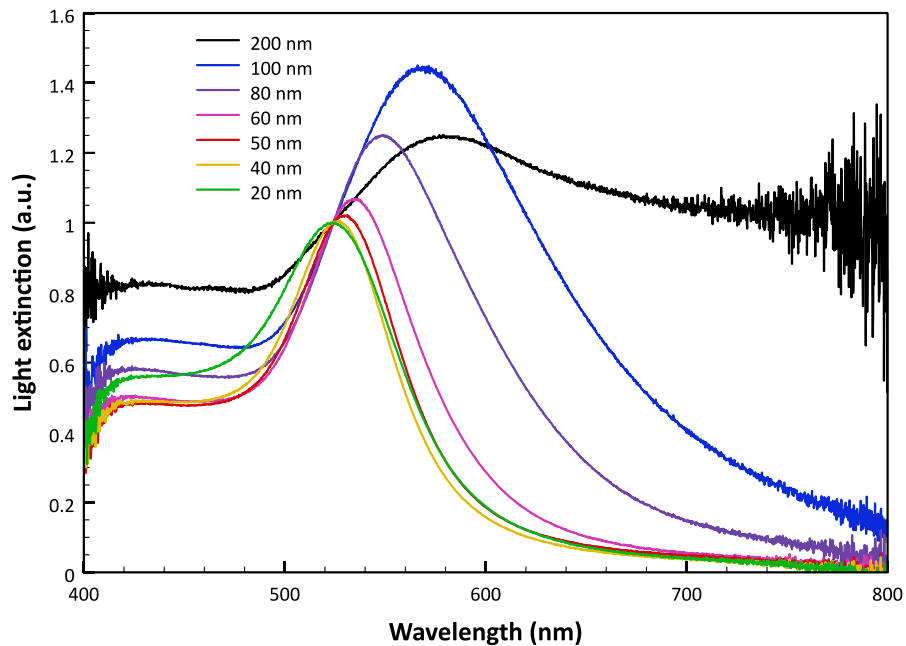

**Figure S1.** Light extinction spectra of different sizes of gold nanoparticles. As the size of the gold nanoparticle increases, the plasmon peak shifts to the infrared wavelength and the light extinction increases.
