# Supplementary material for: Feasibility Study of an Optical Caustic Plasmonic Light Scattering Sensor for Human Serum Anti-Dengue Protein E Antibody Detection
Source: MDPI journal article supplement (doi:10.3390/diagnostics7030047), 2017-08-17
Supplement: s1 [file s1]

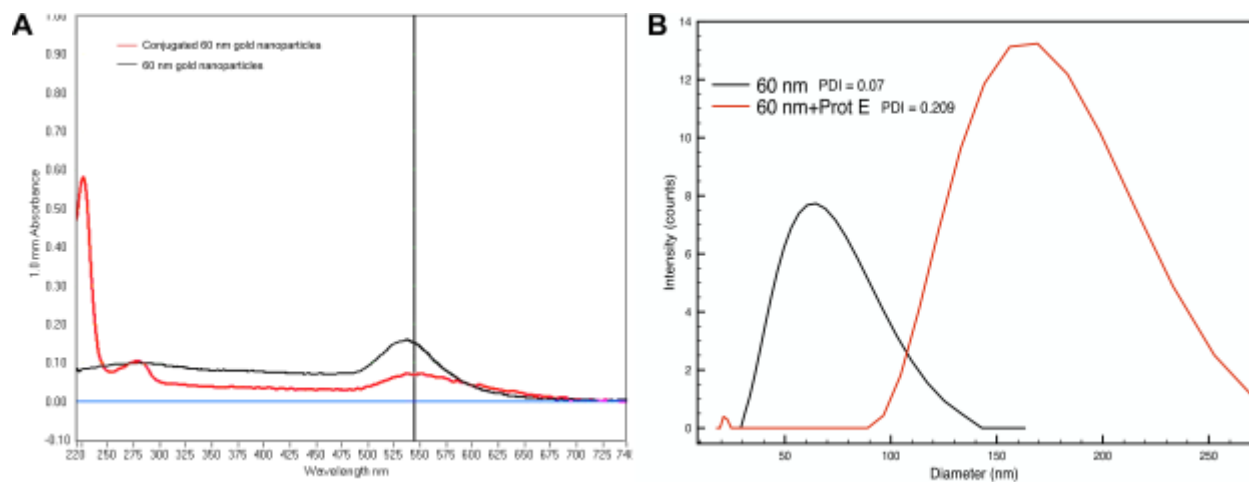

**Figure S2.** Characterization of the conjugated gold nanoparticles. a) Light extinction spectra and b) Hydrodynamic radii of 60 nm gold nanoparticles and Protein E conjugated gold nanoparticles. Polydispersity index (PDI) is indicated for each sample.
